# Supplementary material for: West Nile and Usutu Virus Introduction via Migratory Birds: A Retrospective Analysis in Italy
Source: MDPI journal article supplement (doi:10.3390/v14020416), 2022-02-17
Supplement: s1 [file s1]

**Table S2.** Number of organs (brain and kidneys) collected by different bird species found dead in Ventotene Island

| Order           | Species                                                   | Migratory Strategy <sup>1</sup> | Year  |         |       |         |
|-----------------|-----------------------------------------------------------|---------------------------------|-------|---------|-------|---------|
|                 |                                                           |                                 | 2013  |         | 2014  |         |
|                 |                                                           |                                 | Brain | Kidneys | Brain | Kidneys |
| Charadriiformes | Yellow-legged Gull ( <i>Larus michahellis</i> )           | R                               |       |         | 1     | 1       |
| Galliformes     | Common Quail ( <i>Coturnix coturnix</i> )                 | L                               | 1     | 1       | 3     | 3       |
| Cuculiformes    | Common Cuckoo ( <i>Cuculus canorus</i> )                  | L                               | 1     | 1       |       |         |
| Coraciiformes   | European Bee Eater ( <i>Merops apiaster</i> )             | L                               | 1     | 1       |       |         |
| Passeriformes   | Barn Swallow ( <i>Hirundo rustica</i> )                   | L                               | 1     | 1       |       |         |
|                 | Meadow Pipit ( <i>Anthus pratensis</i> )                  | S                               | 1     | 1       |       |         |
|                 | Tree Pipit ( <i>Anthus trivialis</i> )                    | L                               | 7     | 7       | 2     | 2       |
|                 | Robin ( <i>Erithacus rubecola</i> )                       | S                               | 2     | 2       | 4     | 4       |
|                 | Nightingale ( <i>Luscinia megarhynchos</i> )              | L                               | 8     | 8       | 2     | 2       |
|                 | Common Redstart ( <i>Phoenicurus phoenicurus</i> )        | L                               | 6     | 6       | 5     | 5       |
|                 | Whinchat ( <i>Saxicola rubetra</i> )                      | L                               | 16    | 16      | 2     | 1       |
|                 | Song Thrush ( <i>Turdus philomelos</i> )                  | P                               |       |         | 1     | 2       |
|                 | Garden Warbler ( <i>Sylvia borin</i> )                    | L                               | 7     | 6       | 20    | 21      |
|                 | Blackcap ( <i>Sylvia atricapilla</i> )                    | S                               | 1     | 1       |       |         |
|                 | Common Whitethroat ( <i>Sylvia communis</i> )             | L                               | 11    | 11      | 7     | 7       |
|                 | Sardinian Warbler ( <i>Sylvia melanocephala</i> )         | P                               | 1     | 1       |       |         |
|                 | Subalpine Warbler ( <i>Sylvia cantillans</i> )            | L                               | 10    | 11      | 7     | 6       |
|                 | Reed Warbler ( <i>Acrocephalus scirpaceus</i> )           | L                               |       |         | 1     | 1       |
|                 | Great Reed Warbler ( <i>Acrocephalus arundinaceus</i> )   | L                               | 1     | 1       |       |         |
|                 | Icterine Warbler ( <i>Hippolais icterina</i> )            | L                               | 6     | 8       | 8     | 9       |
|                 | Willow Warbler ( <i>Phylloscopus trochilus</i> )          | L                               | 7     | 8       | 9     | 9       |
|                 | Wood Warbler ( <i>Phylloscopus sibilatrix</i> )           | L                               | 27    | 28      | 6     | 7       |
|                 | Western Bonelli's Warbler ( <i>Phylloscopus bonelli</i> ) | L                               |       | 1       |       |         |
|                 | Common Chiffchaff ( <i>Phylloscopus collybita</i> )       | S                               | 3     | 4       | 4     | 4       |
|                 | Spotted Flycatcher ( <i>Muscicapa striata</i> )           | L                               | 8     | 8       | 2     | 3       |
|                 | Pied Flycatcher ( <i>Ficedula hypoleuca</i> )             | L                               | 31    | 30      | 5     | 6       |
|                 | Collared Flycatcher ( <i>Ficedula albicollis</i> )        | L                               | 8     | 8       | 1     | 1       |
|                 | <i>Ficedula</i> sp.                                       | L                               | 1     | 1       |       |         |
|                 | Eurasian Golden Oriole ( <i>Oriolus oriolus</i> )         | L                               | 1     | 1       | 1     | 1       |
|                 | Serin ( <i>Serinus serinus</i> )                          | P                               | 2     | 2       |       |         |
| Total           |                                                           |                                 | 169   | 174     | 91    | 95      |

Note: <sup>1</sup>S=short distance migrant, L=long distance migrant, P=partial migrant, R=resident.
