# Supplementary material for: West Nile and Usutu Virus Introduction via Migratory Birds: A Retrospective Analysis in Italy
Source: MDPI journal article supplement (doi:10.3390/v14020416), 2022-02-17
Supplement: s1 [file s1]

**Table S1.** Details of sera collected for each bird species among years and seasons

| Order            | Species                                                  | Migratory Strategy <sup>1</sup>                     | Collection site <sup>2</sup> | Serum samples (n. individuals) |          |        |        |         | Total    |
|------------------|----------------------------------------------------------|-----------------------------------------------------|------------------------------|--------------------------------|----------|--------|--------|---------|----------|
|                  |                                                          |                                                     |                              | 2012                           | 2013     |        | 2014   |         |          |
|                  |                                                          |                                                     |                              | Fall                           | Spring   | Fall   | Spring | Fall    |          |
| Anseriformes     | Garganey ( <i>Anas querquedula</i> )                     | L                                                   | M                            |                                | 1(1)     |        |        |         | 1(1)     |
| Galliformes      | Common Quail ( <i>Coturnix coturnix</i> )                | L                                                   | AL, BM, M, VI, ZI            |                                | 142(159) | 5(5)   | 1(1)   |         | 148(165) |
| Accipitriformes  | Marsh Harrier ( <i>Circus aeroginosus</i> )              | P                                                   | VI                           |                                |          | 1(1)   | 1(1)   |         | 2(2)     |
|                  | Eurasian Sparrowhawk ( <i>Accipiter nisus</i> )          | P                                                   | VI                           |                                |          |        | 1(1)   |         | 1(1)     |
| Falconiformes    | Kestrel ( <i>Falco tinnunculus</i> )                     | P                                                   | VI                           |                                |          |        | 2(2)   |         | 2(2)     |
| Gruiformes       | Water Rail ( <i>Rallus aquaticus</i> )                   | P                                                   | AL                           |                                |          | 48(48) |        |         | 48(48)   |
|                  | Spotted Crake ( <i>Porzana porzana</i> )                 | L                                                   | AL                           |                                |          | 28(28) |        |         | 28(28)   |
|                  | Common Moorhen ( <i>Gallinula chloropus</i> )            | P                                                   | AL                           |                                |          | 2(2)   |        |         | 2(2)     |
| Charadriiformes  | Little Ringed Plover ( <i>Charadrius dubius</i> )        | L                                                   | CS                           |                                |          | 1(1)   |        |         | 1(1)     |
|                  | Ringed Plover ( <i>Charadrius hiaticula</i> )            | S                                                   | CS                           | 8(8)                           |          | 10(11) |        |         | 18(19)   |
|                  | Grey Plover ( <i>Pluvialis squatarola</i> )              | L                                                   | CS                           | 1(1)                           |          |        |        |         | 1(1)     |
|                  | Dunlin ( <i>Calidris alpina</i> )                        | S                                                   | CS                           | 2(2)                           |          | 9(16)  |        |         | 11(18)   |
|                  | Ruddy Turnstone ( <i>Arenaria interpres</i> )            | L                                                   | CS, O                        | 2(2)                           |          |        |        |         | 2(2)     |
|                  | Curlew Sandpiper ( <i>Calidris ferruginea</i> )          | L                                                   | CS                           | 9(9)                           |          | 2(4)   |        |         | 11(13)   |
|                  | Wood Sandpiper ( <i>Tringa glareola</i> )                | L                                                   | CS, M                        | 15(15)                         | 37(100)  | 32(56) |        |         | 84(171)  |
|                  | Green Sandpiper ( <i>Tringa ochropus</i> )               | L                                                   | CS                           | 2(2)                           |          | 1(2)   |        |         | 3(4)     |
|                  | Common Sandpiper ( <i>Actitis hypoleucos</i> )           | L                                                   | CS, O                        | 9(9)                           |          | 5(9)   |        |         | 14(18)   |
|                  | Redshank ( <i>Tringa totanus</i> )                       | L                                                   | CS                           |                                |          | 15(19) |        |         | 15(19)   |
|                  | Spotted Redshank ( <i>Tringa erythropus</i> )            | L                                                   | CS                           | 4(4)                           |          |        |        |         | 4(4)     |
|                  | Common Greenshank ( <i>Tringa nebularia</i> )            | L                                                   | CS, O                        | 3(3)                           |          | 3(3)   |        |         | 6(6)     |
|                  | Marsh Sandpiper ( <i>Tringa stagnatilis</i> )            | L                                                   | CS                           |                                |          | 1(1)   |        |         | 1(1)     |
|                  | Ruff ( <i>Philomachus pugnax</i> )                       | L                                                   | M                            |                                | 12(12)   |        |        |         | 12(12)   |
|                  | Black-headed Gull ( <i>Chroicocephalus ridibundus</i> )  | S                                                   | CS                           | 2(2)                           |          |        |        |         | 2(2)     |
|                  | Mediterranean Gull ( <i>Ichthyaetus melanocephalus</i> ) | R                                                   | CS                           | 4(4)                           |          |        |        |         | 4(4)     |
|                  | Sandwich Tern ( <i>Thalasseus sandvicensis</i> )         | L                                                   | CS                           | 20(20)                         |          |        |        |         | 20(20)   |
|                  | Common Tern ( <i>Sterna hirundo</i> )                    | L                                                   | CS                           | 11(11)                         |          |        |        |         | 11(11)   |
|                  | Black Tern ( <i>Chlidonias niger</i> )                   | L                                                   | CS                           | 2(2)                           |          |        |        |         | 2(2)     |
|                  | Columbiformes                                            | European Turtle Dove ( <i>Streptopelia turtur</i> ) | L                            | VI, ZI, BM                     |          | 92(99) |        | 81(81)  |          |
| Cuculiformes     | Common Cuckoo ( <i>Cuculus canorus</i> )                 | L                                                   | VI                           |                                | 1(1)     |        | 5(5)   |         | 6(6)     |
| Strigiformes     | Boreal Owl ( <i>Aegolius funereus</i> )                  | R, Irr                                              | BC                           |                                |          |        |        | 1(1)    | 1(1)     |
|                  | Eurasian Scops-Owl ( <i>Otus scops</i> )                 | L                                                   | VI, ZI, BM, AL               |                                | 6(8)     | 1(1)   | 7(7)   |         | 14(16)   |
| Caprimulgiformes | European Nightjar ( <i>Caprimulgus europaeus</i> )       | L                                                   | VI, ZI                       |                                | 53(64)   |        | 11(11) |         | 64(75)   |
| Bucerotiformes   | Hoopoe ( <i>Upupa epops</i> )                            | L                                                   | VI, ZI, BM                   |                                | 16(25)   |        | 23(23) |         | 39(48)   |
| Coraciiformes    | European Bee Eater ( <i>Merops apiaster</i> )            | L                                                   | VI, ZI, BM, AL               |                                | 28(64)   | 12(21) | 17(39) |         | 57(124)  |
| Piciformes       | Wryneck ( <i>Jynx torquata</i> )                         | L                                                   | VI                           |                                |          |        | 6(15)  |         | 6(15)    |
| Passeriformes    | Barn Swallow ( <i>Hirundo rustica</i> )                  | L                                                   | ML, M                        |                                | 9(73)    |        |        | 60(416) | 69(489)  |

|                                                     |        |             |         |           |          |          |          |            |
|-----------------------------------------------------|--------|-------------|---------|-----------|----------|----------|----------|------------|
| Common Nightingale ( <i>Luscinia megarhynchos</i> ) | L      | VI, ZI      | 4(29)   |           | 4(21)    |          | 8(50)    |            |
| Common Redstart ( <i>Phoenicurus phoenicurus</i> )  | L      | VI, ZI      | 18(140) |           | 11(69)   |          | 29(209)  |            |
| Northern Wheatear ( <i>Oenanthe oenanthe</i> )      | L      | VI          |         |           | 6(26)    |          | 6(26)    |            |
| Whinchat ( <i>Saxicola rubetra</i> )                | L      | ZI          | 13(102) |           |          |          | 13(102)  |            |
| Song Thrush ( <i>Turdus philomelos</i> )            | P      | BC, BAM, VI |         | 21(45)    | 1(1)     | 51(116)  | 73(162)  |            |
| Mistle Thrush ( <i>Turdus viscivorus</i> )          | P      | BC, BAM     |         | 2(2)      |          | 4(4)     | 6(6)     |            |
| Blackbird ( <i>Turdus merula</i> )                  | P      | BC, BAM     |         | 8(8)      |          | 37(38)   | 45(46)   |            |
| Ring Ouzel ( <i>Turdus torquatus</i> )              | P      | BC          |         |           |          | 3(3)     | 3(3)     |            |
| Garden Warbler ( <i>Sylvia borin</i> )              | L      | VI, ZI, C   | 32(255) |           | 10(64)   | 1(10)    | 43(329)  |            |
| Common Whitethroat ( <i>Sylvia communis</i> )       | L      | VI          | 33(280) |           | 5(30)    |          | 38(310)  |            |
| Icterine Warbler ( <i>Hippolais icterina</i> )      | L      | VI          | 9(80)   |           | 5(41)    |          | 14(121)  |            |
| Woodchat Shrike ( <i>Lanius senator</i> )           | L      | VI          |         |           | 7(16)    |          | 7(16)    |            |
| Nutcracker ( <i>Nucifraga caryocatactes</i> )       | R, Irr | BC          |         | 1(1)      |          |          | 1(1)     |            |
| Eurasian Golden Oriole ( <i>Oriolus oriolus</i> )   | L      | ZI, VI      | 58(71)  |           | 55(87)   |          | 113(158) |            |
| Crossbill ( <i>Loxia curvirostra</i> )              | S      | BC          |         |           |          | 12(32)   | 12(32)   |            |
| Hawfinch ( <i>Coccothraustes coccothraustes</i> )   | S      | BC          |         |           |          | 41(86)   | 41(86)   |            |
| Total                                               |        |             | 94(94)  | 564(1563) | 209(294) | 259(541) | 209(696) | 1335(3188) |

Note: <sup>1</sup> L=long distance migrant, S=short distance migrant, P=partial migrant, Irr=irregular migrant, R=resident;

<sup>2</sup> AL= Alfieri Lake, BAM=Barro Mountain, BC=Bocca di Caset, BM=Brisighella Mountain, C=Campotto, CS=Comacchio Salina, M=Mirandola, ML=Matese Lake, O=Ortazzo, VI=Ventotene Island, ZI=Zannone Island.
